# Supplementary material
Source: PubMed Central journal article supplement (PMC4371950)
Supplement: pnas.201502022SI.pdf [file pnas.201502022SI.pdf]

# Supporting Information

D'arc et al. 10.1073/pnas.1502022112

**Table S1. SIVgor infection in wild gorillas**

| Collection sites* | Country  | Subspecies    | No. of fecal samples collected | No. of SIVgor antibody-positive samples | Estimated no. of gorillas <sup>†</sup> | No. of SIVgor antibody-positive gorillas <sup>‡</sup> | No. of vRNA-positive samples | No. of vRNA-positive gorillas <sup>§</sup> | SIVgor prevalence, % <sup>¶</sup> | 95% confidence interval, % <sup>¶</sup> |
|-------------------|----------|---------------|--------------------------------|-----------------------------------------|----------------------------------------|-------------------------------------------------------|------------------------------|--------------------------------------------|-----------------------------------|-----------------------------------------|
| AK                | Cameroon | <i>G.g.g.</i> | 12                             | 0                                       | 7                                      | 0                                                     | 0                            | 0                                          | 0                                 | na                                      |
| AM                | Cameroon | <i>G.g.g.</i> | 104                            | 0                                       | 58                                     | 0                                                     | 0                            | 0                                          | 0                                 | 0–6.2                                   |
| BP                | Cameroon | <i>G.g.g.</i> | 161                            | 48                                      | 55                                     | 10 (+2) <sup>#</sup>                                  | 36                           | 7                                          | 22                                | 12.9–34.8                               |
| BQ                | Cameroon | <i>G.g.g.</i> | 435                            | 9                                       | 132                                    | 1                                                     | 6                            | 1                                          | 0.8                               | 0–4.2                                   |
| BY                | Cameroon | <i>G.g.g.</i> | 141                            | 0                                       | 78                                     | 0                                                     | 0                            | 0                                          | 0                                 | 0–4.7                                   |
| DJ                | Cameroon | <i>G.g.g.</i> | 237                            | 12                                      | 99                                     | 4                                                     | 4                            | 3                                          | 4                                 | 1.6–9.9                                 |
| DK                | Cameroon | <i>G.g.g.</i> | 11                             | 0                                       | 6                                      | 0                                                     | 0                            | 0                                          | 0                                 | na                                      |
| EK                | Cameroon | <i>G.g.g.</i> | 101                            | 0                                       | 43                                     | 0                                                     | 0                            | 0                                          | 0                                 | 0–8.2                                   |
| HC                | Cameroon | <i>G.g.g.</i> | 11                             | 0                                       | 6                                      | 0                                                     | 0                            | 0                                          | 0                                 | na                                      |
| LD                | Cameroon | <i>G.g.g.</i> | 146                            | 1                                       | 50                                     | 1                                                     | 0                            | 0                                          | 2                                 | 0.3–10.5                                |
| MB                | Cameroon | <i>G.g.g.</i> | 118                            | 0                                       | 49                                     | 0                                                     | 0                            | 0                                          | 0                                 | 0–7.3                                   |
| MI                | Cameroon | <i>G.g.g.</i> | 22                             | 0                                       | 12                                     | 0                                                     | 0                            | 0                                          | 0                                 | na                                      |
| NG                | Cameroon | <i>G.g.g.</i> | 167                            | 0                                       | 93                                     | 0                                                     | 0                            | 0                                          | 0                                 | 0–4                                     |
| NY                | Cameroon | <i>G.g.g.</i> | 30                             | 0                                       | 12                                     | 0                                                     | 0                            | 0                                          | 0                                 | na                                      |
| LE                | Gabon    | <i>G.g.g.</i> | 18                             | 0                                       | 10                                     | 0                                                     | 0                            | 0                                          | 0                                 | na                                      |
| LO                | Gabon    | <i>G.g.g.</i> | 35                             | 0                                       | 19                                     | 0                                                     | 0                            | 0                                          | 0                                 | 0–16.8                                  |
| MI                | Gabon    | <i>G.g.g.</i> | 365                            | 0                                       | 152                                    | 0                                                     | 0                            | 0                                          | 0                                 | 0–2.5                                   |
| MK                | Gabon    | <i>G.g.g.</i> | 21                             | 0                                       | 12                                     | 0                                                     | 0                            | 0                                          | 0                                 | na                                      |
| LA                | Gabon    | <i>G.g.g.</i> | 72                             | 0                                       | 40                                     | 0                                                     | 0                            | 0                                          | 0                                 | 0–8.8                                   |
| MA                | Gabon    | <i>G.g.g.</i> | 67                             | 0                                       | 20                                     | 0                                                     | 0                            | 0                                          | 0                                 | 0–16.1                                  |
| MC                | Gabon    | <i>G.g.g.</i> | 7                              | 0                                       | 4                                      | 0                                                     | 0                            | 0                                          | 0                                 | na                                      |
| IV                | Gabon    | <i>G.g.g.</i> | 3                              | 0                                       | 1                                      | 0                                                     | 0                            | 0                                          | 0                                 | na                                      |
| DJ                | Gabon    | <i>G.g.g.</i> | 34                             | 0                                       | 19                                     | 0                                                     | 0                            | 0                                          | 0                                 | 0–16.8                                  |
| ML                | Gabon    | <i>G.g.g.</i> | 10                             | 0                                       | 4                                      | 0                                                     | 0                            | 0                                          | 0                                 | na                                      |
| WA                | Gabon    | <i>G.g.g.</i> | 31                             | 0                                       | 17                                     | 0                                                     | 0                            | 0                                          | 0                                 | 0–18.4                                  |
| LN                | Gabon    | <i>G.g.g.</i> | 22                             | 0                                       | 9                                      | 0                                                     | 0                            | 0                                          | 0                                 | na                                      |
| OY                | Gabon    | <i>G.g.g.</i> | 77                             | 0                                       | 32                                     | 0                                                     | 0                            | 0                                          | 0                                 | 0–10.7                                  |
| IY                | Gabon    | <i>G.g.g.</i> | 27                             | 0                                       | 15                                     | 0                                                     | 0                            | 0                                          | 0                                 | 0–20.4                                  |
| OD                | Gabon    | <i>G.g.g.</i> | 1                              | 0                                       | 1                                      | 0                                                     | 0                            | 0                                          | 0                                 | na                                      |
| LO                | Gabon    | <i>G.g.g.</i> | 125                            | 0                                       | 69                                     | 0                                                     | 0                            | 0                                          | 0                                 | 0–5.5                                   |
| <i>n</i> = 33     |          |               | 2,611                          | 70                                      | 1,134                                  | 16 (+2) <sup>#</sup>                                  | 46                           | 11                                         | 1.6                               | 1.0–2.5                                 |
| VR                | DRC      | <i>G.b.b.</i> | 97                             | 0                                       | 51                                     | 0                                                     | 0                            | 0                                          | 0                                 | 0–7.0                                   |
| BI                | Uganda   | <i>G.b.b.</i> | 121                            | 0                                       | 64                                     | 0                                                     | 0                            | 0                                          | 0                                 | 0–5.7                                   |
| KB                | DRC      | <i>G.b.g.</i> | 103                            | 0                                       | 54                                     | 0                                                     | 0                            | 0                                          | 0                                 | 0–6.6                                   |
| <i>n</i> = 3      |          |               | 321                            | 0                                       | 169                                    | 0                                                     | 0                            | 0                                          | 0                                 | 0–2.2                                   |
| Total             |          |               | 2,932                          | 70                                      | 1,303                                  | 18                                                    | 46                           | 11                                         |                                   |                                         |

*G.b.b.*, *Gorilla berengei berengei*; *G.b.g.*, *Gorilla berengei graueri*; *G.g.g.*, *Gorilla gorilla gorilla*; na, not applicable.

\*Collection sites are indicated with a two letter code, and their locations are shown in Fig. 1.

<sup>†</sup>Number of sampled gorillas was estimated as described in *Materials and Methods*.

<sup>‡</sup>Number of SIVgor-infected gorillas was determined by microsatellite analysis.

<sup>§</sup>Viral RNA (vRNA) was detected by RT-qPCR and/or nested PCR; the number of vRNA-positive individuals was determined by microsatellite analysis.

<sup>¶</sup>Prevalence of SIVgor infection was estimated based on the proportion of SIVgor-positive gorillas; confidence intervals were only calculated when the number of gorillas was greater than 15.

<sup>#</sup>At the BP site, two additional SIVgor-infected gorillas were identified by RT-qPCR (*Results*).







**Table S3. Primer sets used to amplify partial SIVgor *gag*, *pol*, and *env* sequences**

| Fragment name          | Gene       | Round | Primer       | Primer sequences (5'–3')*        | Amplicon size, bp | Ref. |
|------------------------|------------|-------|--------------|----------------------------------|-------------------|------|
| Polmini                | <i>pol</i> | 1     | Polmini F1   | CATGTRGCHAGTGGNTWCMTAGARGCAGARGT | 518               | (1)  |
|                        |            |       | Polmini R1   | ACBACYGCNCCTTCHCCTTTC            |                   |      |
|                        |            | 2     | Polmini F2   | AYAAYCCHCAAAGTCAAGGAGTRGT        | 285               |      |
|                        |            |       | Polmini R2   | GTCCTTTCCAAATDGGRTCTCTGCTGTC     |                   |      |
| PgorGAG <sup>†</sup>   | <i>gag</i> | 1     | PgorGAGF1    | AGGGRCCCTAAGGAACCATTYMGAG        | 513               |      |
|                        |            |       | PgorGAGR1    | CTGYACATAGTTGCCTGGCCTCT          |                   |      |
|                        |            | 2     | PgorGAGF2    | ATTCTACAAAACYCTCAGAGC            | 408               |      |
|                        |            |       | PgorGAGR2    | CTGATYTGCACTCTTTCATTTGRT         |                   |      |
| GOR-GP41               | <i>env</i> | 1     | GOR-GP41 F1  | AGCARGAATTGCTGAGACTYTCTG         | 359               | (2)  |
|                        |            |       | GOR-GP41 R1  | CCANTNTGTTATGTCAAGCCAAC          |                   |      |
|                        |            | 2     | GOR-GP41 F2  | GGCATAAGACARCTCMGAGCTCGC         | 315               |      |
|                        |            |       | GOR-GP41 R2  | AAGCCAACCTCCAAGRTCTGC            |                   |      |
| GP41                   | <i>env</i> | 1     | CPZ-gp41-F1  | TCTTAGGAGCAGCAGGAAGCACTATGGG     | 595               | (3)  |
|                        |            |       | CPZ-gp41-R1  | AACGACAAAGGTGAGTATCCCTGCCTAA     |                   |      |
|                        |            | 2     | CPZ-gp41-F2  | ACAATTATTGTCTGGTATAGTGCAACAGCA   | 454               |      |
|                        |            |       | CPZ-gp41-R2a | TCCTACTATCATTATGAATATTTTATATA    |                   |      |
| GP41-Nef               | <i>env</i> | 1     | GP41neff1b   | AWTGGYTRWGGTAYATHARRAT           | 704               | (4)  |
|                        |            |       | GP41neff1b   | CCCHTCCAGTCCYCCCTTTTC            |                   |      |
|                        |            | 2     | GP41neff2c   | TAGTAAVWAGAGTTAGGCAGGG           | 692               |      |
|                        |            |       | GP41neff2b   | CAGTCCYCCCTTTTCTTTYAAAAA         |                   |      |
| BQgorGP41 <sup>†</sup> | <i>env</i> | 1     | BQgorgp41F1  | AGCTCGCCTGCTGGCCATWGARAC         | 289               |      |
|                        |            |       | BQgorgp41R1  | CCAMARATCTGCCCACTTRTCYAA         |                   |      |
|                        |            | 2     | BQgorgp41F2  | AGCAACTCCTRGMCTGTGGGG            | 155               |      |
|                        |            |       | BQgorgp41R2  | GTARTTGTCTACCARTTTGTCCATT        |                   |      |

\*B = C/G/T, D = A/G/T, H = A/C/T, M = A/C, N = A/C/T/G, R = A/G, V = A/C/G, Y = C/T, W = A/T.

<sup>†</sup>Primers designed for this study.

1. Takehisa J, et al. (2009) Origin and biology of simian immunodeficiency virus in wild-living western gorillas. *J Virol* 83(4):1635–1648.
2. Neel C, et al. (2010) Molecular epidemiology of simian immunodeficiency virus infection in wild-living gorillas. *J Virol* 84(3):1464–1476.
3. Keele BF, et al. (2006) Chimpanzee reservoirs of pandemic and nonpandemic HIV-1. *Science* 313(5786):523–526.
4. Van Heuverswyn F, et al. (2006) Human immunodeficiency viruses: SIV infection in wild gorillas. *Nature* 444(7116):164.
